# Supplementary material
Source: PubMed Central journal article supplement (PMC5741464)
Supplement: NIHMS917456-supplement-2.pdf [file NIHMS917456-supplement-2.pdf]

**Supplementary Table 1: Correlations between pre-botulinum toxin A treatment migraine, photophobia and dry eye symptom severity**

|                                              | Pre-treatment migraine pain severity<br>r/ rho | Pre-treatment photophobia severity<br>r/ rho | Pre-treatment dry eye symptom severity<br>r/ rho |
|----------------------------------------------|------------------------------------------------|----------------------------------------------|--------------------------------------------------|
| Pre-treatment photophobia severity           | 0.329*/0.459 <sup>†</sup>                      | --                                           | 0.194/0.296*                                     |
| Pre-treatment dry eye symptom severity       | 0.341*/0.416 <sup>†</sup>                      | 0.194/0.296*                                 | --                                               |
| Average photophobia severity during migraine | 0.493 <sup>†</sup> /0.548 <sup>†</sup>         | 0.447 <sup>†</sup> /0.568 <sup>†</sup>       | 0.294*/0.336*                                    |
| Average interictal photophobia severity      | 0.232*/0.218*                                  | 0.242*/0.241*                                | 0.394 <sup>†</sup> /0.395 <sup>†</sup>           |

Pearson r; Spearman rho

\*p<0.05; <sup>†</sup>p<0.001
