# Supplementary material
Source: PubMed Central journal article supplement (PMC5741464)
Supplement: NIHMS917456-supplement-3.pdf [file NIHMS917456-supplement-3.pdf]

**Supplementary Table 2: Significant predictors of any improvement to botulinum toxin A treatments with respect to migraine, photophobia, and dry eye severity**

| <b>Factor</b>                                      | <b>Odds Ratio</b> | <b>95% confidence interval</b> | <b>p-value</b> |
|----------------------------------------------------|-------------------|--------------------------------|----------------|
| <b><i>Improvement in Photophobia Severity*</i></b> |                   |                                |                |
| Age                                                | 1.08              | [1.03, 1.14]                   | 0.001          |
| Hypertension                                       | 3.14              | [1.05, 9.36]                   | 0.041          |
| Depression                                         | 2.92              | [1.12, 7.59]                   | 0.028          |
| <b><i>Improvement in Dry Eye Severity*</i></b>     |                   |                                |                |
| Age                                                | 1.07              | [1.02, 1.12]                   | 0.007          |

\*Improvement defined as those responding either “a little better,” “better,” or “much better”
